# Supplementary material for: Selective Electrochemical Determination of Etoposide Using a Molecularly Imprinted Overoxidized Polypyrrole Coated Glassy Carbon Electrode
Source: Hindawi journal article supplement (doi:10.1155/2019/5394235), 2019-01-02
Supplement: f1 [file 5394235.f1.zip]

Archive with 4 entries (3 files):
- 5394235.f1/
- 5394235.f1/Figure S1_IJELC_2619068.xlsx
- 5394235.f1/Figure S2_IJELC_2619069.pdf
- 5394235.f1/Supplementary Materials_IJELC_2619059.docx
