# Supplementary material for: Selective Electrochemical Determination of Etoposide Using a Molecularly Imprinted Overoxidized Polypyrrole Coated Glassy Carbon Electrode
Source: Hindawi journal article supplement (doi:10.1155/2019/5394235), 2019-01-02
Supplement: f1 [file 5394235.f1.zip › 5394235.f1/Figure S1_IJELC_2619068.xlsx]

## Sheet: (A) Cyclic voltammograms
Potential [ V]	Current density [mA]
0.8	1.735
0.8005	1.69813
0.801	1.66438
0.8015	1.6325
0.802	1.60281
0.8025	1.57563
0.803	1.55063
0.8035	1.52656
0.804	1.50375
0.8045	1.48375
0.805	1.46281
0.8055	1.445
0.806	1.42625
0.8065	1.41
0.807	1.39531
0.8075	1.37781
0.808	1.36594
0.8085	1.35156
0.809	1.33813
0.8095	1.32625											0
0.81	1.315
0.8105	1.30188
0.811	1.29125
0.8115	1.28063
0.812	1.27031
0.8125	1.25938
0.813	1.25063
0.8135	1.24031
0.814	1.23281
0.8145	1.22375
0.815	1.21563
0.8155	1.20688
0.816	1.19844
0.8165	1.19125
0.817	1.18375
0.8175	1.17594
0.818	1.16844
0.8185	1.16125
0.819	1.15438
0.8195	1.1475
0.82	1.14094
0.8205	1.13313
0.821	1.12719
0.8215	1.12125
0.822	1.11656
0.8225	1.11031
0.823	1.10313
0.8235	1.09719
0.824	1.09156
0.8245	1.085
0.825	1.08031
0.8255	1.07563
0.826	1.06813
0.8265	1.06375
0.827	1.05781
0.8275	1.0525
0.828	1.04781
0.8285	1.04313
0.829	1.03781
0.8295	1.0325
0.83	1.02688
0.8305	1.0225
0.831	1.01781
0.8315	1.01281
0.832	1.00813
0.8325	1.00344
0.833	0.99875
0.8335	0.99375
0.834	0.990625
0.8345	0.985
0.835	0.98125
0.8355	0.976563
0.836	0.972188
0.8365	0.967188
0.837	0.962813
0.8375	0.959063
0.838	0.955
0.8385	0.949375
0.839	0.946875
0.8395	0.942813
0.84	0.93875
0.8405	0.934688
0.841	0.93125
0.8415	0.926563
0.842	0.922813
0.8425	0.918125
0.843	0.915313
0.8435	0.911563
0.844	0.907188
0.8445	0.903125
0.845	0.900625
0.8455	0.897188
0.846	0.893125
0.8465	0.89
0.847	0.885938
0.8475	0.883125
0.848	0.880313
0.8485	0.875313
0.849	0.8725
0.8495	0.869375
0.85	0.866563
0.8505	0.863438
0.851	0.86
0.8515	0.856563
0.852	0.852813
0.8525	0.849375
0.853	0.846875
0.8535	0.84375
0.854	0.841563
0.8545	0.837188
0.855	0.835
0.8555	0.831875
0.856	0.82875
0.8565	0.825313
0.857	0.8225
0.8575	0.820313
0.858	0.8175
0.8585	0.814375
0.859	0.812813
0.8595	0.81
0.86	0.807188
0.8605	0.804688
0.861	0.800938
0.8615	0.79875
0.862	0.795938
0.8625	0.793438
0.863	0.791875
0.8635	0.788125
0.864	0.787813
0.8645	0.78375
0.865	0.780938
0.8655	0.779063
0.866	0.776563
0.8665	0.773438
0.867	0.771875
0.8675	0.769688
0.868	0.768438
0.8685	0.765
0.869	0.763125
0.8695	0.760313
0.87	0.758438
0.8705	0.755938
0.871	0.754375
0.8715	0.752188
0.872	0.749375
0.8725	0.748125
0.873	0.744688
0.8735	0.743438
0.874	0.741563
0.8745	0.739688
0.875	0.7375
0.8755	0.735938
0.876	0.73375
0.8765	0.7325
0.877	0.730625
0.8775	0.728438
0.878	0.725938
0.8785	0.725313
0.879	0.722188
0.8795	0.721563
0.88	0.719063
0.8805	0.717188
0.881	0.715
0.8815	0.7125
0.882	0.71125
0.8825	0.709063
0.883	0.708125
0.8835	0.706875
0.884	0.705
0.8845	0.703438
0.885	0.702188
0.8855	0.699688
0.886	0.69875
0.8865	0.696563
0.887	0.695
0.8875	0.694063
0.888	0.691875
0.8885	0.690313
0.889	0.689063
0.8895	0.68875
0.89	0.686563
0.8905	0.684688
0.891	0.683125
0.8915	0.681563
0.892	0.680313
0.8925	0.67875
0.893	0.676875
0.8935	0.675938
0.894	0.674375
0.8945	0.67375
0.895	0.672188
0.8955	0.67125
0.896	0.669688
0.8965	0.668125
0.897	0.666563
0.8975	0.665938
0.898	0.66375
0.8985	0.662813
0.899	0.661875
0.8995	0.660938
0.9	0.659375
0.9005	0.658125
0.901	0.6575
0.9015	0.654688
0.902	0.654375
0.9025	0.653125
0.903	0.652188
0.9035	0.65125
0.904	0.650313
0.9045	0.648438
0.905	0.6475
0.9055	0.646563
0.906	0.645938
0.9065	0.644063
0.907	0.643125
0.9075	0.643125
0.908	0.64125
0.9085	0.639375
0.909	0.638125
0.9095	0.638125
0.91	0.63625
0.9105	0.635625
0.911	0.634063
0.9115	0.633438
0.912	0.632188
0.9125	0.631875
0.913	0.630938
0.9135	0.62875
0.914	0.629375
0.9145	0.626875
0.915	0.625938
0.9155	0.625
0.916	0.625
0.9165	0.622813
0.917	0.623438
0.9175	0.620313
0.918	0.6175
0.9185	0.616563
0.919	0.617813
0.9195	0.616875
0.92	0.614688
0.9205	0.612813
0.921	0.61375
0.9215	0.611563
0.922	0.610313
0.9225	0.609375
0.923	0.608438
0.9235	0.6075
0.924	0.605938
0.9245	0.605625
0.925	0.604375
0.9255	0.60375
0.926	0.60375
0.9265	0.602188
0.927	0.601875
0.9275	0.6
0.928	0.600938
0.9285	0.599688
0.929	0.59875
0.9295	0.598125
0.93	0.598125
0.9305	0.5975
0.931	0.596563
0.9315	0.595
0.932	0.594688
0.9325	0.593125
0.933	0.592813
0.9335	0.592188
0.934	0.5925
0.9345	0.590625
0.935	0.59125
0.9355	0.59
0.936	0.589375
0.9365	0.588438
0.937	0.588438
0.9375	0.587188
0.938	0.5875
0.9385	0.585625
0.939	0.585313
0.9395	0.585313
0.94	0.585313
0.9405	0.58375
0.941	0.582813
0.9415	0.5825
0.942	0.582188
0.9425	0.580938
0.943	0.580938
0.9435	0.580313
0.944	0.580313
0.9445	0.57875
0.945	0.577813
0.9455	0.578125
0.946	0.5775
0.9465	0.5775
0.947	0.575938
0.9475	0.576875
0.948	0.575313
0.9485	0.575313
0.949	0.574688
0.9495	0.573125
0.95	0.57375
0.9505	0.572813
0.951	0.572813
0.9515	0.571875
0.952	0.571563
0.9525	0.570938
0.953	0.570938
0.9535	0.57
0.954	0.56875
0.9545	0.569063
0.955	0.568438
0.9555	0.567813
0.956	0.568438
0.9565	0.5675
0.957	0.566563
0.9575	0.566563
0.958	0.565625
0.9585	0.565
0.959	0.565
0.9595	0.564375
0.96	0.56375
0.9605	0.563438
0.961	0.564375
0.9615	0.56375
0.962	0.562813
0.9625	0.561875
0.963	0.5625
0.9635	0.561563
0.964	0.56125
0.9645	0.56
0.965	0.560938
0.9655	0.560625
0.966	0.559063
0.9665	0.55875
0.967	0.559375
0.9675	0.558438
0.968	0.558438
0.9685	0.5575
0.969	0.5575
0.9695	0.556563
0.97	0.555938
0.9705	0.555625
0.971	0.556563
0.9715	0.555313
0.972	0.554688
0.9725	0.555313
0.973	0.555625
0.9735	0.554063
0.974	0.553125
0.9745	0.553438
0.975	0.55375
0.9755	0.553125
0.976	0.551875
0.9765	0.5525
0.977	0.550938
0.9775	0.551875
0.978	0.55
0.9785	0.550938
0.979	0.550625
0.9795	0.550625
0.98	0.549688
0.9805	0.549063
0.981	0.54875
0.9815	0.549063
0.982	0.548125
0.9825	0.547188
0.983	0.548125
0.9835	0.5475
0.984	0.547188
0.9845	0.5475
0.985	0.547188
0.9855	0.54625
0.986	0.54625
0.9865	0.546563
0.987	0.545313
0.9875	0.545
0.988	0.545625
0.9885	0.545
0.989	0.544063
0.9895	0.544375
0.99	0.544063
0.9905	0.544688
0.991	0.543438
0.9915	0.54375
0.992	0.5425
0.9925	0.542813
0.993	0.543125
0.9935	0.541875
0.994	0.541563
0.9945	0.5425
0.995	0.541563
0.9955	0.541875
0.996	0.54125
0.9965	0.54125
0.997	0.540938
0.9975	0.539375
0.998	0.539688
0.9985	0.539375
0.999	0.54
0.9995	0.539063
1	0.53875
1.0005	0.53875
1.001	0.538438
1.0015	0.537813
1.002	0.537813
1.0025	0.53875
1.003	0.537188
1.0035	0.537813
1.004	0.53625
1.0045	0.535625
1.005	0.536875
1.0055	0.5375
1.006	0.536563
1.0065	0.53625
1.007	0.535625
1.0075	0.535625
1.008	0.53625
1.0085	0.534688
1.009	0.535
1.0095	0.535
1.01	0.535
1.0105	0.534375
1.011	0.534063
1.0115	0.534375
1.012	0.534063
1.0125	0.533438
1.013	0.533438
1.0135	0.533438
1.014	0.532812
1.0145	0.533438
1.015	0.532812
1.0155	0.532812
1.016	0.531875
1.0165	0.532188
1.017	0.531875
1.0175	0.531875
1.018	0.531563
1.0185	0.532188
1.019	0.530625
1.0195	0.531563
1.02	0.530938
1.0205	0.53125
1.021	0.530625
1.0215	0.529375
1.022	0.530625
1.0225	0.529375
1.023	0.529375
1.0235	0.53
1.024	0.529688
1.0245	0.529375
1.025	0.52875
1.0255	0.52875
1.026	0.529375
1.0265	0.528125
1.027	0.528438
1.0275	0.527813
1.028	0.527813
1.0285	0.528438
1.029	0.528125
1.0295	0.5275
1.03	0.526875
1.0305	0.5275
1.031	0.526875
1.0315	0.526875
1.032	0.527188
1.0325	0.527188
1.033	0.526875
1.0335	0.52625
1.034	0.525938
1.0345	0.52625
1.035	0.52625
1.0355	0.525312
1.036	0.525938
1.0365	0.525312
1.037	0.52625
1.0375	0.525938
1.038	0.525
1.0385	0.525312
1.039	0.525312
1.0395	0.524375
1.04	0.524375
1.0405	0.524063
1.041	0.522813
1.0415	0.524063
1.042	0.523438
1.0425	0.522813
1.043	0.524063
1.0435	0.523438
1.044	0.523125
1.0445	0.523125
1.045	0.523125
1.0455	0.5225
1.046	0.522188
1.0465	0.522188
1.047	0.5225
1.0475	0.522188
1.048	0.5225
1.0485	0.521875
1.049	0.522188
1.0495	0.522188
1.05	0.521563
1.0505	0.521875
1.051	0.522188
1.0515	0.520313
1.052	0.520313
1.0525	0.520938
1.053	0.520625
1.0535	0.52
1.054	0.520313
1.0545	0.520313
1.055	0.520625
1.0555	0.520625
1.056	0.519688
1.0565	0.519063
1.057	0.519375
1.0575	0.519688
1.058	0.51875
1.0585	0.51875
1.059	0.518438
1.0595	0.519063
1.06	0.51875
1.0605	0.519375
1.061	0.51875
1.0615	0.5175
1.062	0.519063
1.0625	0.518125
1.063	0.518125
1.0635	0.5175
1.064	0.5175
1.0645	0.5175
1.065	0.517188
1.0655	0.51625
1.066	0.517188
1.0665	0.517188
1.067	0.518125
1.0675	0.516875
1.068	0.516875
1.0685	0.516875
1.069	0.516563
1.0695	0.515938
1.07	0.516563
1.0705	0.516563
1.071	0.51625
1.0715	0.515938
1.072	0.515
1.0725	0.514688
1.073	0.515313
1.0735	0.515313
1.074	0.514688
1.0745	0.514063
1.075	0.514688
1.0755	0.514375
1.076	0.515
1.0765	0.514063
1.077	0.514063
1.0775	0.514063
1.078	0.514063
1.0785	0.514375
1.079	0.513125
1.0795	0.513438
1.08	0.513125
1.0805	0.51375
1.081	0.51375
1.0815	0.513125
1.082	0.513125
1.0825	0.512188
1.083	0.513125
1.0835	0.512188
1.084	0.512813
1.0845	0.513125
1.085	0.511875
1.0855	0.512188
1.086	0.511563
1.0865	0.5125
1.087	0.512188
1.0875	0.51125
1.088	0.511875
1.0885	0.51125
1.089	0.51125
1.0895	0.510625
1.09	0.51125
1.0905	0.510938
1.091	0.510625
1.0915	0.510625
1.092	0.510938
1.0925	0.510313
1.093	0.509063
1.0935	0.510313
1.094	0.510313
1.0945	0.509375
1.095	0.510313
1.0955	0.509375
1.096	0.509063
1.0965	0.50875
1.097	0.50875
1.0975	0.50875
1.098	0.508438
1.0985	0.508438
1.099	0.508125
1.0995	0.508125
1.1	0.50875
1.1005	0.509063
1.101	0.5075
1.1015	0.5075
1.102	0.5075
1.1025	0.508125
1.103	0.506875
1.1035	0.506875
1.104	0.506875
1.1045	0.507188
1.105	0.506875
1.1055	0.507188
1.106	0.5075
1.1065	0.507188
1.107	0.506875
1.1075	0.505938
1.108	0.50625
1.1085	0.506563
1.109	0.505625
1.1095	0.505625
1.11	0.505313
1.1105	0.50625
1.111	0.505625
1.1115	0.50625
1.112	0.505313
1.1125	0.505938
1.113	0.505625
1.1135	0.504375
1.114	0.504063
1.1145	0.504375
1.115	0.50375
1.1155	0.504375
1.116	0.504063
1.1165	0.504688
1.117	0.50375
1.1175	0.504688
1.118	0.50375
1.1185	0.503125
1.119	0.503438
1.1195	0.50375
1.12	0.503438
1.1205	0.503125
1.121	0.503125
1.1215	0.502188
1.122	0.5025
1.1225	0.502188
1.123	0.502813
1.1235	0.5025
1.124	0.502188
1.1245	0.502188
1.125	0.501875
1.1255	0.501875
1.126	0.501875
1.1265	0.50125
1.127	0.50125
1.1275	0.50125
1.128	0.50125
1.1285	0.501563
1.129	0.501563
1.1295	0.500938
1.13	0.501563
1.1305	0.499688
1.131	0.500313
1.1315	0.500625
1.132	0.5
1.1325	0.500313
1.133	0.499375
1.1335	0.499375
1.134	0.5
1.1345	0.500313
1.135	0.499375
1.1355	0.49875
1.136	0.498437
1.1365	0.49875
1.137	0.49875
1.1375	0.499063
1.138	0.498125
1.1385	0.497813
1.139	0.497813
1.1395	0.498125
1.14	0.497813
1.1405	0.497813
1.141	0.498437
1.1415	0.498125
1.142	0.497188
1.1425	0.4975
1.143	0.497813
1.1435	0.497188
1.144	0.49625
1.1445	0.4975
1.145	0.497188
1.1455	0.49625
1.146	0.495938
1.1465	0.495625
1.147	0.495313
1.1475	0.495938
1.148	0.495625
1.1485	0.495938
1.149	0.495313
1.1495	0.495625
1.15	0.495
1.1505	0.495625
1.151	0.494688
1.1515	0.495
1.152	0.494688
1.1525	0.495
1.153	0.495313
1.1535	0.493438
1.154	0.494375
1.1545	0.49375
1.155	0.49375
1.1555	0.494063
1.156	0.49375
1.1565	0.493125
1.157	0.49375
1.1575	0.492188
1.158	0.4925
1.1585	0.493438
1.159	0.4925
1.1595	0.493125
1.16	0.493125
1.1605	0.492813
1.161	0.4925
1.1615	0.4925
1.162	0.493125
1.1625	0.491875
1.163	0.491875
1.1635	0.490937
1.164	0.491875
1.1645	0.49125
1.165	0.491563
1.1655	0.490937
1.166	0.490313
1.1665	0.490625
1.167	0.490937
1.1675	0.490625
1.168	0.490937
1.1685	0.490313
1.169	0.49
1.1695	0.49
1.17	0.490625
1.1705	0.488438
1.171	0.490313
1.1715	0.489375
1.172	0.48875
1.1725	0.48875
1.173	0.489375
1.1735	0.48875
1.174	0.487813
1.1745	0.487813
1.175	0.488438
1.1755	0.48875
1.176	0.488438
1.1765	0.487813
1.177	0.487813
1.1775	0.488125
1.178	0.488438
1.1785	0.487813
1.179	0.488125
1.1795	0.487813
1.18	0.4875
1.1805	0.486875
1.181	0.487188
1.1815	0.486563
1.182	0.487188
1.1825	0.486563
1.183	0.48625
1.1835	0.48625
1.184	0.485625
1.1845	0.48625
1.185	0.48625
1.1855	0.485313
1.186	0.486563
1.1865	0.484688
1.187	0.484688
1.1875	0.484688
1.188	0.485313
1.1885	0.485
1.189	0.485
1.1895	0.484688
1.19	0.484375
1.1905	0.484688
1.191	0.485
1.1915	0.484063
1.192	0.484063
1.1925	0.483438
1.193	0.484063
1.1935	0.484063
1.194	0.48375
1.1945	0.483125
1.195	0.482188
1.1955	0.483438
1.196	0.483438
1.1965	0.483125
1.197	0.483125
1.1975	0.481563
1.198	0.483125
1.1985	0.482188
1.199	0.4825
1.1995	0.481875
1.2	0.482813
1.1995	0.48125
1.199	0.47875
1.1985	0.476563
1.198	0.475938
1.1975	0.475
1.197	0.474063
1.1965	0.4725
1.196	0.471875
1.1955	0.471563
1.195	0.47125
1.1945	0.469063
1.194	0.46875
1.1935	0.466875
1.193	0.466875
1.1925	0.465938
1.192	0.465
1.1915	0.464375
1.191	0.464063
1.1905	0.462188
1.19	0.462188
1.1895	0.460625
1.189	0.460313
1.1885	0.459063
1.188	0.459375
1.1875	0.458125
1.187	0.458125
1.1865	0.456563
1.186	0.454688
1.1855	0.454375
1.185	0.45375
1.1845	0.453125
1.184	0.453125
1.1835	0.452188
1.183	0.45125
1.1825	0.450625
1.182	0.44875
1.1815	0.449063
1.181	0.449063
1.1805	0.447188
1.18	0.446563
1.1795	0.445625
1.179	0.445938
1.1785	0.445
1.178	0.44375
1.1775	0.443125
1.177	0.442813
1.1765	0.4425
1.176	0.44125
1.1755	0.440938
1.175	0.44
1.1745	0.438125
1.174	0.439063
1.1735	0.4375
1.173	0.436875
1.1725	0.435625
1.172	0.43625
1.1715	0.435625
1.171	0.434375
1.1705	0.433438
1.17	0.432813
1.1695	0.432188
1.169	0.4325
1.1685	0.4325
1.168	0.430313
1.1675	0.430313
1.167	0.42875
1.1665	0.428438
1.166	0.428438
1.1655	0.427188
1.165	0.427188
1.1645	0.426563
1.164	0.425938
1.1635	0.424688
1.163	0.424688
1.1625	0.424063
1.162	0.42375
1.1615	0.423125
1.161	0.421875
1.1605	0.42125
1.16	0.420625
1.1595	0.419375
1.159	0.419688
1.1585	0.419688
1.158	0.41875
1.1575	0.417813
1.157	0.416875
1.1565	0.416563
1.156	0.41625
1.1555	0.415
1.155	0.414688
1.1545	0.414375
1.154	0.41375
1.1535	0.41375
1.153	0.412813
1.1525	0.411875
1.152	0.411563
1.1515	0.411875
1.151	0.409063
1.1505	0.410313
1.15	0.409375
1.1495	0.407813
1.149	0.408438
1.1485	0.4075
1.148	0.4075
1.1475	0.40625
1.147	0.405938
1.1465	0.404375
1.146	0.405
1.1455	0.404375
1.145	0.404063
1.1445	0.403125
1.144	0.403125
1.1435	0.401875
1.143	0.401563
1.1425	0.4
1.142	0.40125
1.1415	0.400313
1.141	0.39875
1.1405	0.399063
1.14	0.398438
1.1395	0.397813
1.139	0.396875
1.1385	0.396875
1.138	0.395938
1.1375	0.395625
1.137	0.395313
1.1365	0.394375
1.136	0.395
1.1355	0.394688
1.135	0.3925
1.1345	0.392188
1.134	0.3925
1.1335	0.392188
1.133	0.390938
1.1325	0.390625
1.132	0.390625
1.1315	0.389063
1.131	0.388438
1.1305	0.38875
1.13	0.389063
1.1295	0.388125
1.129	0.387188
1.1285	0.385938
1.128	0.385938
1.1275	0.385938
1.127	0.385313
1.1265	0.385
1.126	0.384688
1.1255	0.384688
1.125	0.384063
1.1245	0.383125
1.124	0.381875
1.1235	0.381875
1.123	0.381875
1.1225	0.380313
1.122	0.380625
1.1215	0.380313
1.121	0.38
1.1205	0.37875
1.12	0.37875
1.1195	0.377813
1.119	0.377813
1.1185	0.377188
1.118	0.376875
1.1175	0.375625
1.117	0.376563
1.1165	0.375625
1.116	0.375
1.1155	0.374063
1.115	0.37375
1.1145	0.373438
1.114	0.373125
1.1135	0.372188
1.113	0.373125
1.1125	0.372188
1.112	0.371875
1.1115	0.370625
1.111	0.37
1.1105	0.369375
1.11	0.37
1.1095	0.369063
1.109	0.369063
1.1085	0.368438
1.108	0.368438
1.1075	0.367188
1.107	0.367188
1.1065	0.365625
1.106	0.366563
1.1055	0.365938
1.105	0.365938
1.1045	0.365625
1.104	0.364688
1.1035	0.364063
1.103	0.363438
1.1025	0.362813
1.102	0.363125
1.1015	0.361563
1.101	0.361875
1.1005	0.36125
1.1	0.361875
1.0995	0.360625
1.099	0.360625
1.0985	0.359688
1.098	0.359375
1.0975	0.35875
1.097	0.358438
1.0965	0.35875
1.096	0.3575
1.0955	0.358125
1.095	0.3575
1.0945	0.356563
1.094	0.355625
1.0935	0.355938
1.093	0.355313
1.0925	0.355313
1.092	0.355313
1.0915	0.354063
1.091	0.354063
1.0905	0.354063
1.09	0.352813
1.0895	0.353125
1.089	0.352188
1.0885	0.351563
1.088	0.350625
1.0875	0.351563
1.087	0.350313
1.0865	0.35
1.086	0.35
1.0855	0.349375
1.085	0.34875
1.0845	0.348438
1.084	0.349063
1.0835	0.34875
1.083	0.349063
1.0825	0.346875
1.082	0.3475
1.0815	0.345625
1.081	0.346563
1.0805	0.345938
1.08	0.345313
1.0795	0.345625
1.079	0.344375
1.0785	0.34375
1.078	0.34375
1.0775	0.344375
1.077	0.343125
1.0765	0.3425
1.076	0.3425
1.0755	0.341875
1.075	0.341875
1.0745	0.341875
1.074	0.340938
1.0735	0.340625
1.073	0.340313
1.0725	0.339375
1.072	0.339375
1.0715	0.34
1.071	0.33875
1.0705	0.339063
1.07	0.338125
1.0695	0.337813
1.069	0.337813
1.0685	0.337813
1.068	0.3375
1.0675	0.33625
1.067	0.335313
1.0665	0.335625
1.066	0.335625
1.0655	0.335313
1.065	0.33375
1.0645	0.334688
1.064	0.334688
1.0635	0.33375
1.063	0.334063
1.0625	0.333125
1.062	0.3325
1.0615	0.3325
1.061	0.3325
1.0605	0.330938
1.06	0.33125
1.0595	0.330625
1.059	0.33125
1.0585	0.330313
1.058	0.329688
1.0575	0.329688
1.057	0.328438
1.0565	0.328438
1.056	0.329063
1.0555	0.3275
1.055	0.328125
1.0545	0.327813
1.054	0.3275
1.0535	0.326875
1.053	0.325313
1.0525	0.326563
1.052	0.32625
1.0515	0.325625
1.051	0.325625
1.0505	0.325
1.05	0.325
1.0495	0.324375
1.049	0.32375
1.0485	0.32375
1.048	0.324063
1.0475	0.323125
1.047	0.322813
1.0465	0.322813
1.046	0.321875
1.0455	0.32125
1.045	0.3225
1.0445	0.320938
1.044	0.320938
1.0435	0.320938
1.043	0.32
1.0425	0.320313
1.042	0.319688
1.0415	0.32
1.041	0.31875
1.0405	0.318438
1.04	0.318438
1.0395	0.317813
1.039	0.318125
1.0385	0.317188
1.038	0.316875
1.0375	0.317188
1.037	0.316875
1.0365	0.315625
1.036	0.315625
1.0355	0.315625
1.035	0.315313
1.0345	0.315313
1.034	0.315313
1.0335	0.314688
1.033	0.314688
1.0325	0.314063
1.032	0.314063
1.0315	0.313125
1.031	0.312813
1.0305	0.313125
1.03	0.313125
1.0295	0.311875
1.029	0.312188
1.0285	0.311875
1.028	0.31125
1.0275	0.311563
1.027	0.310938
1.0265	0.310938
1.026	0.310313
1.0255	0.31
1.025	0.310625
1.0245	0.310313
1.024	0.309688
1.0235	0.30875
1.023	0.309063
1.0225	0.308125
1.022	0.308438
1.0215	0.307813
1.021	0.307813
1.0205	0.30625
1.02	0.306875
1.0195	0.306563
1.019	0.306563
1.0185	0.306563
1.018	0.305625
1.0175	0.305625
1.017	0.304375
1.0165	0.305
1.016	0.304375
1.0155	0.304688
1.015	0.304375
1.0145	0.304688
1.014	0.30375
1.0135	0.30375
1.013	0.303438
1.0125	0.303438
1.012	0.302813
1.0115	0.302188
1.011	0.301875
1.0105	0.301563
1.01	0.301875
1.0095	0.301875
1.009	0.300938
1.0085	0.300625
1.008	0.300625
1.0075	0.300938
1.007	0.301563
1.0065	0.299375
1.006	0.299375
1.0055	0.300313
1.005	0.298438
1.0045	0.29875
1.004	0.298438
1.0035	0.299063
1.003	0.297813
1.0025	0.297813
1.002	0.297188
1.0015	0.297188
1.001	0.296563
1.0005	0.296875
1	0.296563
0.9995	0.295938
0.999	0.295938
0.9985	0.295625
0.998	0.295
0.9975	0.294688
0.997	0.294688
0.9965	0.295313
0.996	0.29375
0.9955	0.295
0.995	0.294063
0.9945	0.2925
0.994	0.293125
0.9935	0.294375
0.993	0.292188
0.9925	0.2925
0.992	0.292813
0.9915	0.292188
0.991	0.2925
0.9905	0.291875
0.99	0.291563
0.9895	0.291875
0.989	0.291875
0.9885	0.29
0.988	0.290938
0.9875	0.289688
0.987	0.289375
0.9865	0.289375
0.986	0.29
0.9855	0.289375
0.985	0.289688
0.9845	0.289063
0.984	0.289063
0.9835	0.288125
0.983	0.288125
0.9825	0.287813
0.982	0.2875
0.9815	0.287813
0.981	0.2875
0.9805	0.286563
0.98	0.28625
0.9795	0.285938
0.979	0.285938
0.9785	0.285625
0.978	0.286563
0.9775	0.285
0.977	0.285938
0.9765	0.285938
0.976	0.284063
0.9755	0.285313
0.975	0.283438
0.9745	0.28375
0.974	0.283438
0.9735	0.284063
0.973	0.283438
0.9725	0.282813
0.972	0.283438
0.9715	0.2825
0.971	0.283438
0.9705	0.282813
0.97	0.281875
0.9695	0.282188
0.969	0.281875
0.9685	0.28125
0.968	0.28125
0.9675	0.280938
0.967	0.280938
0.9665	0.281563
0.966	0.28
0.9655	0.28125
0.965	0.28
0.9645	0.279688
0.964	0.279688
0.9635	0.279375
0.963	0.279375
0.9625	0.279375
0.962	0.27875
0.9615	0.278125
0.961	0.278438
0.9605	0.277813
0.96	0.277813
0.9595	0.277813
0.959	0.277813
0.9585	0.277188
0.958	0.276563
0.9575	0.276875
0.957	0.27625
0.9565	0.27625
0.956	0.275625
0.9555	0.276875
0.955	0.275625
0.9545	0.275625
0.954	0.275313
0.9535	0.275938
0.953	0.274375
0.9525	0.274375
0.952	0.274375
0.9515	0.273438
0.951	0.274063
0.9505	0.274375
0.95	0.27375
0.9495	0.27375
0.949	0.274063
0.9485	0.273125
0.948	0.273125
0.9475	0.272813
0.947	0.2725
0.9465	0.273125
0.946	0.272813
0.9455	0.272188
0.945	0.2725
0.9445	0.27125
0.944	0.270625
0.9435	0.27125
0.943	0.270625
0.9425	0.270938
0.942	0.27
0.9415	0.270625
0.941	0.27
0.9405	0.269688
0.94	0.27
0.9395	0.27
0.939	0.269063
0.9385	0.268438
0.938	0.26875
0.9375	0.268438
0.937	0.268438
0.9365	0.268125
0.936	0.268438
0.9355	0.2675
0.935	0.2675
0.9345	0.268125
0.934	0.267188
0.9335	0.267813
0.933	0.267188
0.9325	0.265938
0.932	0.266875
0.9315	0.265313
0.931	0.265938
0.9305	0.265938
0.93	0.265625
0.9295	0.265625
0.929	0.265
0.9285	0.264688
0.928	0.264063
0.9275	0.264063
0.927	0.264375
0.9265	0.264688
0.926	0.26375
0.9255	0.26375
0.925	0.26375
0.9245	0.263438
0.924	0.262813
0.9235	0.262813
0.923	0.262813
0.9225	0.262813
0.922	0.263438
0.9215	0.261875
0.921	0.261875
0.9205	0.26125
0.92	0.26125
0.9195	0.262188
0.919	0.261563
0.9185	0.260625
0.918	0.260938
0.9175	0.260938
0.917	0.260625
0.9165	0.260938
0.916	0.260313
0.9155	0.259375
0.915	0.259375
0.9145	0.259375
0.914	0.259375
0.9135	0.259063
0.913	0.259063
0.9125	0.258438
0.912	0.258438
0.9115	0.259063
0.911	0.259063
0.9105	0.257812
0.91	0.257812
0.9095	0.257812
0.909	0.257188
0.9085	0.258125
0.908	0.256875
0.9075	0.255938
0.907	0.257188
0.9065	0.256563
0.906	0.256563
0.9055	0.255625
0.905	0.25625
0.9045	0.255938
0.904	0.255938
0.9035	0.255313
0.903	0.255625
0.9025	0.255313
0.902	0.255
0.9015	0.254375
0.901	0.255
0.9005	0.25375
0.9	0.254375
0.8995	0.254063
0.899	0.25375
0.8985	0.253125
0.898	0.253125
0.8975	0.253438
0.897	0.252813
0.8965	0.253125
0.896	0.252813
0.8955	0.252188
0.895	0.252188
0.8945	0.252188
0.894	0.251875
0.8935	0.251875
0.893	0.25125
0.8925	0.251875
0.892	0.250938
0.8915	0.250625
0.891	0.25125
0.8905	0.250938
0.89	0.250625
0.8895	0.25
0.889	0.249688
0.8885	0.24875
0.888	0.250625
0.8875	0.25
0.887	0.249063
0.8865	0.25
0.886	0.249063
0.8855	0.24875
0.885	0.249375
0.8845	0.24875
0.884	0.248125
0.8835	0.247188
0.883	0.248125
0.8825	0.247188
0.882	0.2475
0.8815	0.246563
0.881	0.246563
0.8805	0.246875
0.88	0.246875
0.8795	0.245313
0.879	0.2475
0.8785	0.245938
0.878	0.245938
0.8775	0.245
0.877	0.245
0.8765	0.245625
0.876	0.245
0.8755	0.244375
0.875	0.244688
0.8745	0.245
0.874	0.244063
0.8735	0.243125
0.873	0.242813
0.8725	0.244063
0.872	0.243438
0.8715	0.24375
0.871	0.2425
0.8705	0.242813
0.87	0.243125
0.8695	0.2425
0.869	0.241563
0.8685	0.241875
0.868	0.242188
0.8675	0.241875
0.867	0.241875
0.8665	0.241875
0.866	0.241875
0.8655	0.241875
0.865	0.240938
0.8645	0.240313
0.864	0.240938
0.8635	0.24125
0.863	0.240625
0.8625	0.240313
0.862	0.24
0.8615	0.239375
0.861	0.239063
0.8605	0.24
0.86	0.239375
0.8595	0.23875
0.859	0.237813
0.8585	0.238125
0.858	0.238438
0.8575	0.237813
0.857	0.238125
0.8565	0.237813
0.856	0.2375
0.8555	0.2375
0.855	0.2375
0.8545	0.2375
0.854	0.235938
0.8535	0.236875
0.853	0.2375
0.8525	0.23625
0.852	0.235625
0.8515	0.23625
0.851	0.235313
0.8505	0.23625
0.85	0.235
0.8495	0.235
0.849	0.234688
0.8485	0.234688
0.848	0.234063
0.8475	0.234375
0.847	0.234375
0.8465	0.234375
0.846	0.233125
0.8455	0.234375
0.845	0.233438
0.8445	0.233438
0.844	0.232813
0.8435	0.232813
0.843	0.2325
0.8425	0.2325
0.842	0.2325
0.8415	0.231875
0.841	0.231875
0.8405	0.231875
0.84	0.231563
0.8395	0.231563
0.839	0.231563
0.8385	0.23125
0.838	0.230313
0.8375	0.23125
0.837	0.23
0.8365	0.229063
0.836	0.230313
0.8355	0.229688
0.835	0.229063
0.8345	0.23
0.834	0.230313
0.8335	0.228438
0.833	0.229375
0.8325	0.228125
0.832	0.22875
0.8315	0.227813
0.831	0.227813
0.8305	0.2275
0.83	0.228125
0.8295	0.227188
0.829	0.227188
0.8285	0.227188
0.828	0.226563
0.8275	0.225625
0.827	0.226563
0.8265	0.225625
0.826	0.225625
0.8255	0.225313
0.825	0.225313
0.8245	0.225625
0.824	0.225625
0.8235	0.225
0.823	0.224375
0.8225	0.224688
0.822	0.224063
0.8215	0.224688
0.821	0.224063
0.8205	0.224375
0.82	0.223438
0.8195	0.223438
0.819	0.222813
0.8185	0.223125
0.818	0.223125
0.8175	0.2225
0.817	0.223125
0.8165	0.221875
0.816	0.221563
0.8155	0.221875
0.815	0.221563
0.8145	0.220938
0.814	0.22125
0.8135	0.22125
0.813	0.221875
0.8125	0.220938
0.812	0.220313
0.8115	0.22
0.811	0.22
0.8105	0.220938
0.81	0.219063
0.8095	0.21875
0.809	0.219063
0.8085	0.219688
0.808	0.21875
0.8075	0.21875
0.807	0.219063
0.8065	0.218125
0.806	0.217813
0.8055	0.218438
0.805	0.2175
0.8045	0.218438
0.804	0.217813
0.8035	0.215938
0.803	0.2175
0.8025	0.217188
0.802	0.21625
0.8015	0.21625
0.801	0.216563
0.8005	0.215938
0.8	0.215938
0.8005	0.2175
0.801	0.218438
0.8015	0.21875
0.802	0.220313
0.8025	0.219375
0.803	0.219375
0.8035	0.220313
0.804	0.219688
0.8045	0.219688
0.805	0.220938
0.8055	0.221563
0.806	0.221875
0.8065	0.221875
0.807	0.222188
0.8075	0.220938
0.808	0.221563
0.8085	0.223438
0.809	0.222188
0.8095	0.222188
0.81	0.223125
0.8105	0.223125
0.811	0.223438
0.8115	0.223438
0.812	0.223125
0.8125	0.22375
0.813	0.22375
0.8135	0.223438
0.814	0.224375
0.8145	0.224375
0.815	0.224375
0.8155	0.224375
0.816	0.224688
0.8165	0.225313
0.817	0.225
0.8175	0.225625
0.818	0.225313
0.8185	0.225938
0.819	0.225313
0.8195	0.225938
0.82	0.225625
0.8205	0.225625
0.821	0.226563
0.8215	0.22625
0.822	0.226563
0.8225	0.227188
0.823	0.226875
0.8235	0.227188
0.824	0.226875
0.8245	0.226875
0.825	0.228125
0.8255	0.228438
0.826	0.2275
0.8265	0.2275
0.827	0.227813
0.8275	0.227813
0.828	0.227813
0.8285	0.229375
0.829	0.228438
0.8295	0.229375
0.83	0.22875
0.8305	0.229063
0.831	0.228125
0.8315	0.228438
0.832	0.22875
0.8325	0.228125
0.833	0.229063
0.8335	0.23
0.834	0.229375
0.8345	0.229688
0.835	0.230625
0.8355	0.230313
0.836	0.23
0.8365	0.230938
0.837	0.23125
0.8375	0.230938
0.838	0.230938
0.8385	0.23125
0.839	0.230938
0.8395	0.23125
0.84	0.230625
0.8405	0.232813
0.841	0.230938
0.8415	0.232188
0.842	0.232813
0.8425	0.231563
0.843	0.233438
0.8435	0.231875
0.844	0.233125
0.8445	0.2325
0.845	0.232813
0.8455	0.2325
0.846	0.233125
0.8465	0.233125
0.847	0.23375
0.8475	0.23375
0.848	0.23375
0.8485	0.23375
0.849	0.232813
0.8495	0.234063
0.85	0.235
0.8505	0.234375
0.851	0.234375
0.8515	0.234375
0.852	0.234688
0.8525	0.234688
0.853	0.235313
0.8535	0.235313
0.854	0.235625
0.8545	0.235938
0.855	0.234688
0.8555	0.235
0.856	0.23625
0.8565	0.235938
0.857	0.235625
0.8575	0.235625
0.858	0.235625
0.8585	0.23625
0.859	0.236563
0.8595	0.236875
0.86	0.236875
0.8605	0.2375
0.861	0.2375
0.8615	0.2375
0.862	0.236875
0.8625	0.236563
0.863	0.237813
0.8635	0.237188
0.864	0.238438
0.8645	0.236875
0.865	0.239063
0.8655	0.239375
0.866	0.238438
0.8665	0.238125
0.867	0.238438
0.8675	0.238438
0.868	0.238125
0.8685	0.23875
0.869	0.239063
0.8695	0.239063
0.87	0.239375
0.8705	0.24
0.871	0.239375
0.8715	0.240313
0.872	0.239375
0.8725	0.240313
0.873	0.240313
0.8735	0.240313
0.874	0.24125
0.8745	0.240625
0.875	0.240938
0.8755	0.240313
0.876	0.240938
0.8765	0.241563
0.877	0.24125
0.8775	0.24125
0.878	0.242188
0.8785	0.242188
0.879	0.24125
0.8795	0.242188
0.88	0.24125
0.8805	0.241875
0.881	0.242188
0.8815	0.2425
0.882	0.2425
0.8825	0.242188
0.883	0.2425
0.8835	0.243125
0.884	0.2425
0.8845	0.2425
0.885	0.243125
0.8855	0.24375
0.886	0.243438
0.8865	0.244063
0.887	0.24375
0.8875	0.243438
0.888	0.244063
0.8885	0.24375
0.889	0.244375
0.8895	0.244375
0.89	0.245313
0.8905	0.245
0.891	0.245
0.8915	0.245313
0.892	0.245
0.8925	0.245
0.893	0.246563
0.8935	0.245625
0.894	0.245625
0.8945	0.245313
0.895	0.24625
0.8955	0.245625
0.896	0.245625
0.8965	0.246875
0.897	0.246875
0.8975	0.24625
0.898	0.246563
0.8985	0.246563
0.899	0.246563
0.8995	0.248125
0.9	0.247813
0.9005	0.246563
0.901	0.2475
0.9015	0.248438
0.902	0.247813
0.9025	0.2475
0.903	0.2475
0.9035	0.248125
0.904	0.2475
0.9045	0.248125
0.905	0.248125
0.9055	0.24875
0.906	0.248438
0.9065	0.249063
0.907	0.249063
0.9075	0.24875
0.908	0.249688
0.9085	0.249375
0.909	0.24875
0.9095	0.250938
0.91	0.25
0.9105	0.249688
0.911	0.249063
0.9115	0.250625
0.912	0.250312
0.9125	0.25
0.913	0.251563
0.9135	0.250938
0.914	0.250625
0.9145	0.251563
0.915	0.25125
0.9155	0.251875
0.916	0.250938
0.9165	0.251875
0.917	0.25125
0.9175	0.252188
0.918	0.251563
0.9185	0.251563
0.919	0.251563
0.9195	0.253125
0.92	0.251875
0.9205	0.252188
0.921	0.251875
0.9215	0.253125
0.922	0.252813
0.9225	0.252813
0.923	0.253125
0.9235	0.252813
0.924	0.253125
0.9245	0.254063
0.925	0.253438
0.9255	0.254063
0.926	0.253438
0.9265	0.253438
0.927	0.254375
0.9275	0.254375
0.928	0.254688
0.9285	0.255
0.929	0.254063
0.9295	0.254688
0.93	0.254063
0.9305	0.255313
0.931	0.255
0.9315	0.255625
0.932	0.254688
0.9325	0.255625
0.933	0.25625
0.9335	0.255625
0.934	0.255313
0.9345	0.25625
0.935	0.25625
0.9355	0.25625
0.936	0.255625
0.9365	0.256875
0.937	0.2575
0.9375	0.257188
0.938	0.257188
0.9385	0.25625
0.939	0.2575
0.9395	0.256875
0.94	0.256875
0.9405	0.2575
0.941	0.258125
0.9415	0.25875
0.942	0.257812
0.9425	0.2575
0.943	0.257812
0.9435	0.258438
0.944	0.258438
0.9445	0.25875
0.945	0.25875
0.9455	0.258438
0.946	0.25875
0.9465	0.259375
0.947	0.259375
0.9475	0.259375
0.948	0.259063
0.9485	0.259375
0.949	0.259688
0.9495	0.260313
0.95	0.260313
0.9505	0.260313
0.951	0.259688
0.9515	0.260313
0.952	0.260938
0.9525	0.260625
0.953	0.260938
0.9535	0.26125
0.954	0.260313
0.9545	0.26125
0.955	0.26125
0.9555	0.261875
0.956	0.261875
0.9565	0.262188
0.957	0.261563
0.9575	0.261875
0.958	0.261875
0.9585	0.261875
0.959	0.262188
0.9595	0.263125
0.96	0.2625
0.9605	0.2625
0.961	0.262813
0.9615	0.262813
0.962	0.263125
0.9625	0.26375
0.963	0.263125
0.9635	0.26375
0.964	0.264063
0.9645	0.26375
0.965	0.26375
0.9655	0.264063
0.966	0.264063
0.9665	0.26375
0.967	0.264688
0.9675	0.26375
0.968	0.264063
0.9685	0.264063
0.969	0.264063
0.9695	0.265
0.97	0.265
0.9705	0.265313
0.971	0.265625
0.9715	0.26625
0.972	0.265938
0.9725	0.26625
0.973	0.265625
0.9735	0.265625
0.974	0.265313
0.9745	0.267188
0.975	0.265938
0.9755	0.266563
0.976	0.266563
0.9765	0.266563
0.977	0.266875
0.9775	0.2675
0.978	0.266875
0.9785	0.267813
0.979	0.2675
0.9795	0.2675
0.98	0.266875
0.9805	0.268125
0.981	0.267813
0.9815	0.267813
0.982	0.268438
0.9825	0.268125
0.983	0.2675
0.9835	0.267813
0.984	0.268438
0.9845	0.268438
0.985	0.268125
0.9855	0.268438
0.986	0.269688
0.9865	0.269375
0.987	0.269063
0.9875	0.268438
0.988	0.269375
0.9885	0.270313
0.989	0.270313
0.9895	0.27
0.99	0.270313
0.9905	0.270625
0.991	0.270313
0.9915	0.27
0.992	0.270938
0.9925	0.271563
0.993	0.27
0.9935	0.270938
0.994	0.270938
0.9945	0.27125
0.995	0.27125
0.9955	0.27125
0.996	0.271563
0.9965	0.27125
0.997	0.271875
0.9975	0.271875
0.998	0.272188
0.9985	0.2725
0.999	0.272188
[truncated: 62,000 more rows]

## Sheet: (B) Evolution of the concentrat
Number of Cycles	Concentration of ETP (10-4 M)	Standard Deviation
0	0	0
5	0.9	0.07
10	1.526	0.08
15	2	0.06
20	2.357	0.07
25	2.632	0.1
30	2.846	0.07
35	2.95	0.08
40	3	0.09
45	3	0.08
50	3	0.06
60	3	0.07
70	3	0.09
