# Supplementary material for: Selective Electrochemical Determination of Etoposide Using a Molecularly Imprinted Overoxidized Polypyrrole Coated Glassy Carbon Electrode
Source: Hindawi journal article supplement (doi:10.1155/2019/5394235), 2019-01-02
Supplement: f1 [file 5394235.f1.zip › 5394235.f1/Supplementary Materials_IJELC_2619059.docx]

**Supplementary Materials: Selective electrochemical determination of Etoposide using a molecularly imprinted overoxidized polypyrrole coated glassy carbon electrode**

**Hajer Hrichi 1,2*, Lotfi Monser 2 and Nafaâ Adhoum 2,3**

*1 Chemistry Department, College of Science, Jouf University, P.O. Box: 2014, Sakaka, Saudi Arabia*

##### *2 National Institute of Applied Sciences and Technology, Carthage University, Centre Urbain Nord, B.P.No676, 1080 Tunis Cedex, Tunisia*

*3 Preparatory School for Engineering Studies, Kairouan University, Tunisia*

**Corresponding Author: Dr. Hajer Hrichi* Ph.D.*

*Chemistry Department, College of Science, Jouf University, P.O. Box: 2014, Sakaka, Saudi Arabia.*

*Email Address: hahrichi@ju.edu.sa*

**
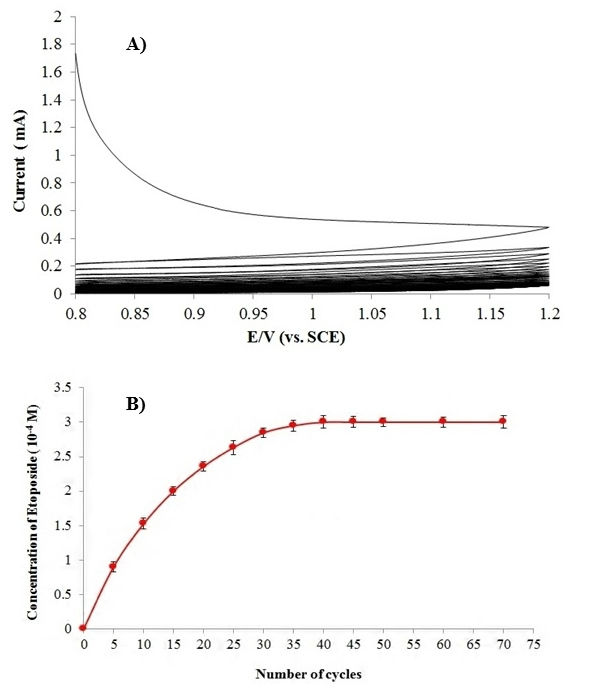
**

**FIGURE S.1:** **(A)** Cyclic voltammograms taking during the overoxidation operation ([NaOH]: 0.1 M; scan rate: 50 mVs-1; number of scans: 40), **(B)** Evolution of the concentration of ETP released from the polymeric matrix during its removal with the number of cycles applied during the overoxidation process. Error bars represent standard deviations of three independent measurements.


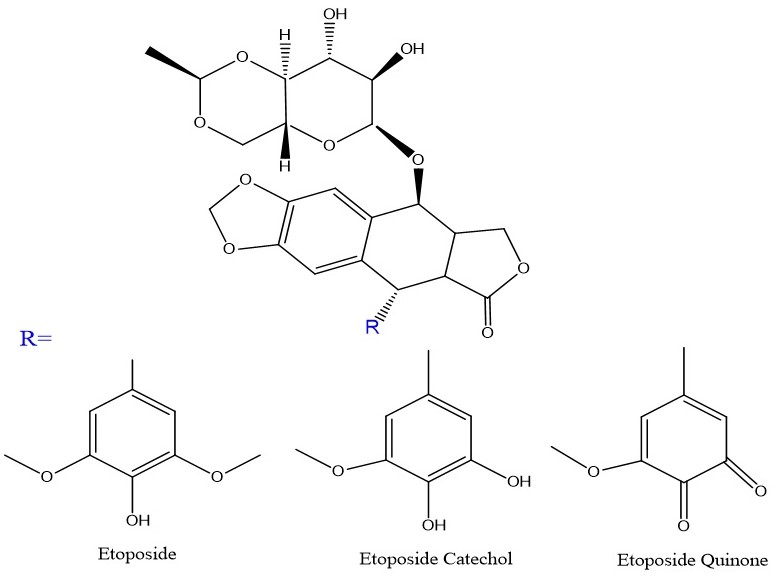


**FIGURE S.2:** Structures of Etoposide, Etoposide catechol and Etoposide quinone.

**TABLE S.1**: Effect of small variations in BRB concentration and pH on recovery of 5.0×10-6 M of Etoposide.

| **Variable** | **Condition** | **Modification** | **Recovery (%) ± % RSD (n=3)** |
| --- | --- | --- | --- |
| Britton Robinson concentration | 0.05 M | 0.04 M | 99.24 ± 0.25 |
| 0.05 M | 0.05 M | 99.12 ± 0.42 |
| 0.05 M | 0.06 M | 99.46 ± 0.38 |
| pH | pH 4.0 | 3.9 | 98.74 ±0.11 |
| pH 4.0 | 4.0 | 99.31 ± 0.34 |
| pH 4.0 | 4.1 | 99.19 ±0.67 |
