# Supplementary figures and images for: Selective Electrochemical Determination of Etoposide Using a Molecularly Imprinted Overoxidized Polypyrrole Coated Glassy Carbon Electrode
Source: Hindawi journal article supplement (doi:10.1155/2019/5394235), 2019-01-02

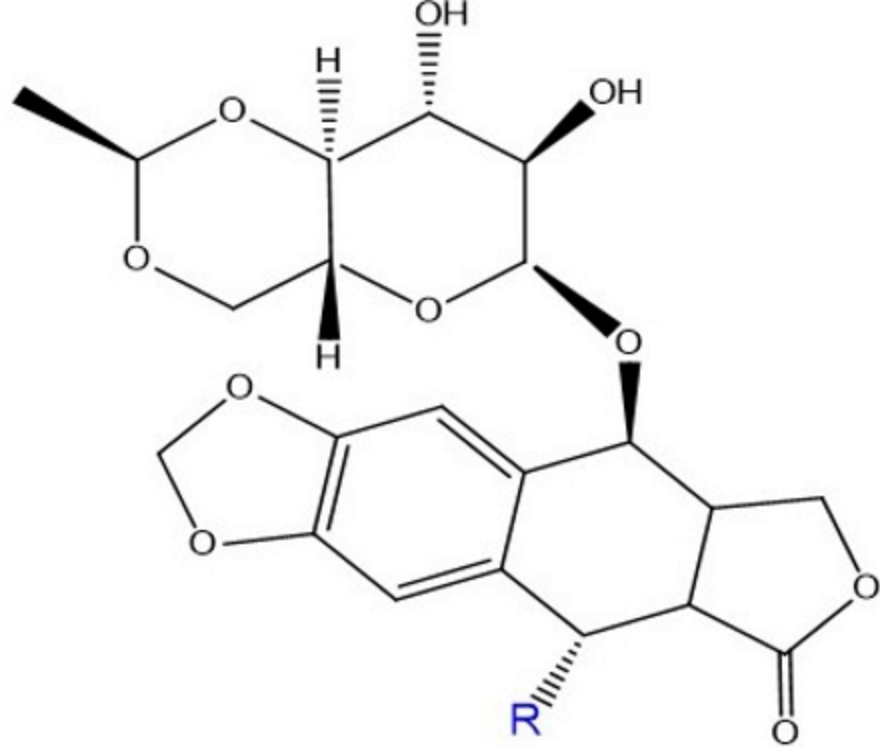

$R=$

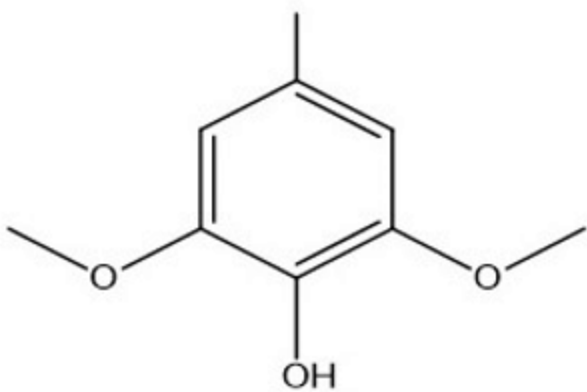

Etoposide

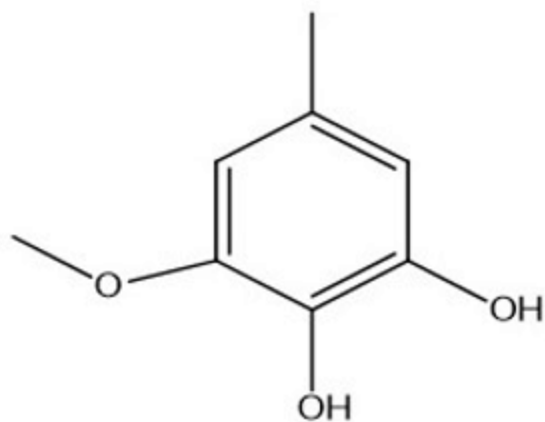

Etoposide Catechol

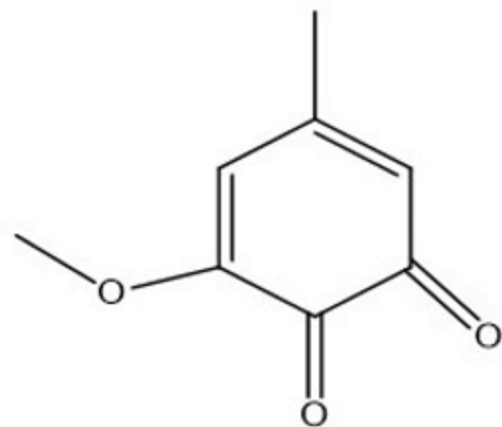

Etoposide Quinone

Supplement: f1 [file 5394235.f1.zip]
